# Supplementary material
Source: PubMed Central journal article supplement (PMC6086987)
Supplement: BPH-175-3581-s001.pdf [file BPH-175-3581-s001.pdf]

## Supporting information

### Antimicrobial endotoxin-neutralizing peptides promote keratinocyte migration via P2X7 receptor activation and accelerate wound healing *in vivo*

Anja Pfalzgraff, Sergio Bárcena-Varela, Lena Heinbockel, Thomas Gutschmann, Klaus Brandenburg, Guillermo Martinez-de-Tejada, Günther Weindl\*

\*Corresponding author: [Guenther.Weindl@fu-berlin.de](mailto:Guenther.Weindl@fu-berlin.de)

## Supplementary figures

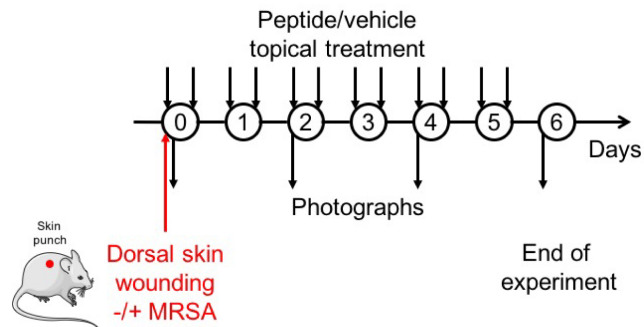

### Supplementary figure S1

Experimental setup for *in vivo* wound healing experiments.

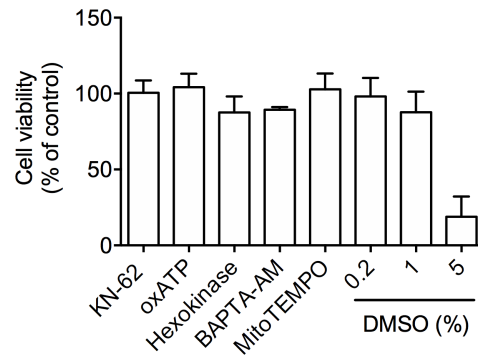

### Supplementary figure S2

HaCaT cells were stimulated for 24 h with inhibitors and cell viability was analysed by MTT assay. DMSO (0.2, 1 and 5%, v/v) served as controls. Data are mean + SD (n = 6).

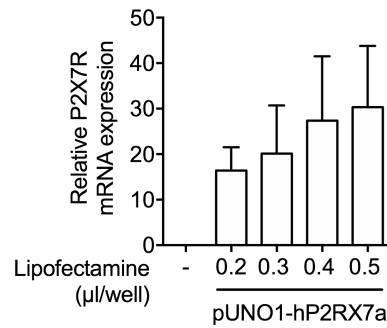

### Supplementary figure S3

HEK293 cells were transfected with 0.1 μg pUNO1 plasmid encoding for human P2X7R using lipofectamine. After 24 h, gene expression of *hP2X7R* was determined by qPCR. mRNA expression values were normalised to *YWHAZ*. Data are mean + SD (n = 5).
